# Supplementary material for: A new turn-on benzimidazole-based greenish-yellow fluorescent sensor for Zn2+ions at biological pH applicable in cell imaging
Source: Royal Society of Chemistry journal article supplement (doi:10.1039/c7nj01821e), 2017-01-01
Supplement: c7nj01821e1.pdf [file c7nj01821e1.pdf]

## *Supporting Information*

### For

### **A new turn-on benzimidazole based greenish-yellow fluorescent sensor for Zn<sup>2+</sup> ion at biological pH applicable in cell imaging.**

Abhishek Maji,<sup>a</sup> Siddhartha Pal,<sup>a</sup> Somenath Lohar,<sup>a</sup> Subhra Kanti Mukhopadhyay<sup>b</sup> and Pabitra Chattopadhyay<sup>a\*</sup>

<sup>a</sup>*Department of Chemistry, The University of Burdwan, Golapbag, Burdwan-713104, West Bengal, India,*

<sup>b</sup>*Department of Microbiology, The University of Burdwan, Golapbag, Burdwan-713104, West Bengal, India., E-mail: pabitracc@yahoo.com*

## CONTENTS

1. **Fig. S1** FTIR spectrum of **HL**
2. **Fig. S2** <sup>1</sup>H NMR spectrum of **HL** in DMSO-d<sub>6</sub>
3. **Fig. S3** <sup>13</sup>C NMR spectrum of **HL** in DMSO-d<sub>6</sub>
4. **Fig. S4** ESI-Mass spectrum of **HL**
5. **Fig. S5** FTIR spectrum of the [**Zn(L<sup>1</sup>)<sub>2</sub>**] complex
6. **Fig. S6** <sup>1</sup>H NMR spectrum of [**Zn(L<sup>1</sup>)<sub>2</sub>**] complex in DMSO-d<sub>6</sub>
7. **Fig. S7** <sup>13</sup>C NMR spectrum of [**Zn(L<sup>1</sup>)<sub>2</sub>**] complex in DMSO-d<sub>6</sub>
8. **Fig. S8** ESI-Mass spectrum of the [**Zn(L<sup>1</sup>)<sub>2</sub>**] complex
9. **Fig. S9** Fluorescence response of **HL** (16 μM) in absence and in presence of Zn<sup>2+</sup> ions (0.5 equivalent) at different pH in 5 mM HEPES buffer (DMSO : water, 1/5, v/v) at 27 °C
10. **Fig. S10** Naked eye and fluorescence color of the probe in absence and presence of Zn<sup>2+</sup> ions
11. **Fig. S11** The linear response curve of the emission of **HL** at 538 nm depending on Zn<sup>2+</sup> ions concentration
12. **Fig. S12** Binding constant curve from non-linear fitting of UV-vis titration data
13. **Fig. S13** Fluorescence intensity of **HL** in presence of different cations
14. **Fig. S14** Change of relative fluorescence intensity profile of [**Zn(L<sup>1</sup>)<sub>2</sub>**] in presence of different cations
15. **Fig. S15** Effect of different competitive cations on the absorbance property of [**Zn(L<sup>1</sup>)<sub>2</sub>**]

16. **Fig. S16** Fluorescence intensity profile of  $[\text{Zn}(\text{L}^1)_2]$  in presence of different anions
17. **Fig. S17** Time resolved fluorescence decay of **HL** ( $16\mu\text{M}$ ) in absence and presence of added  $\text{Zn}^{2+}$  ions
18. **Fig. S18** Computational study of probe **HL** and  $[\text{Zn}(\text{L}^1)_2]$  complex
19. **Fig. S19** Cytotoxic effect of **HL**
20. **Table S1** Selected bond distances ( $\text{\AA}$ ) and bond angles ( $^\circ$ ) for  $\text{C}_{28}\text{H}_{32}\text{N}_3\text{O}\cdot\text{NO}_3$
21. **Table S2** Life time details of **HL** and  $[\text{Zn}(\text{L}^1)_2]$  complex

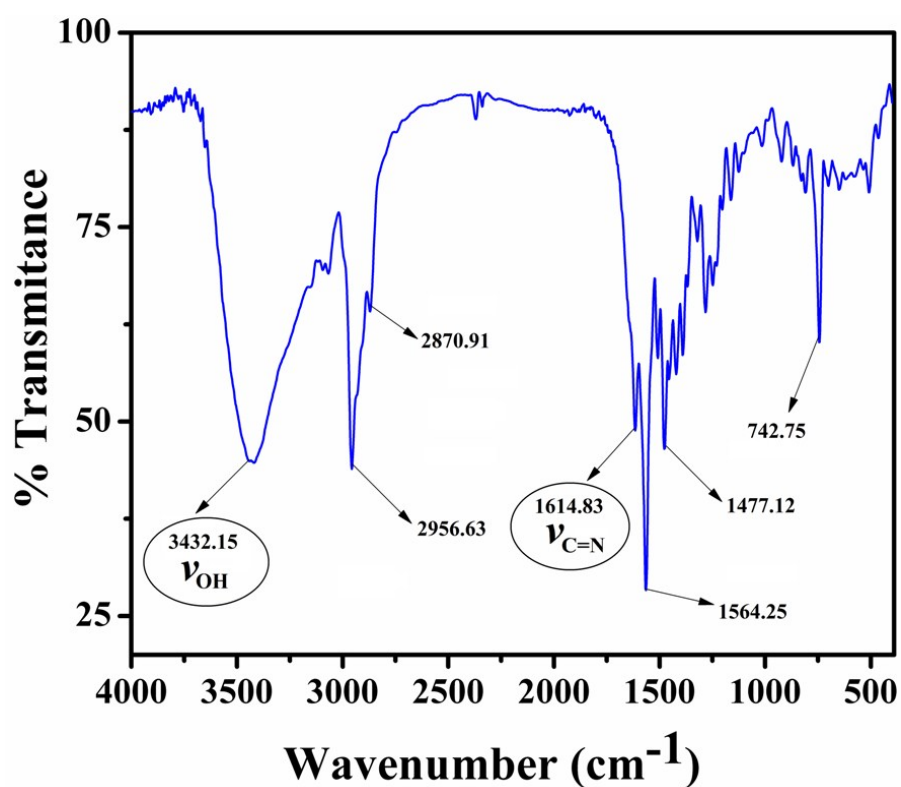

**Fig. S1** FTIR spectrum of **HL**

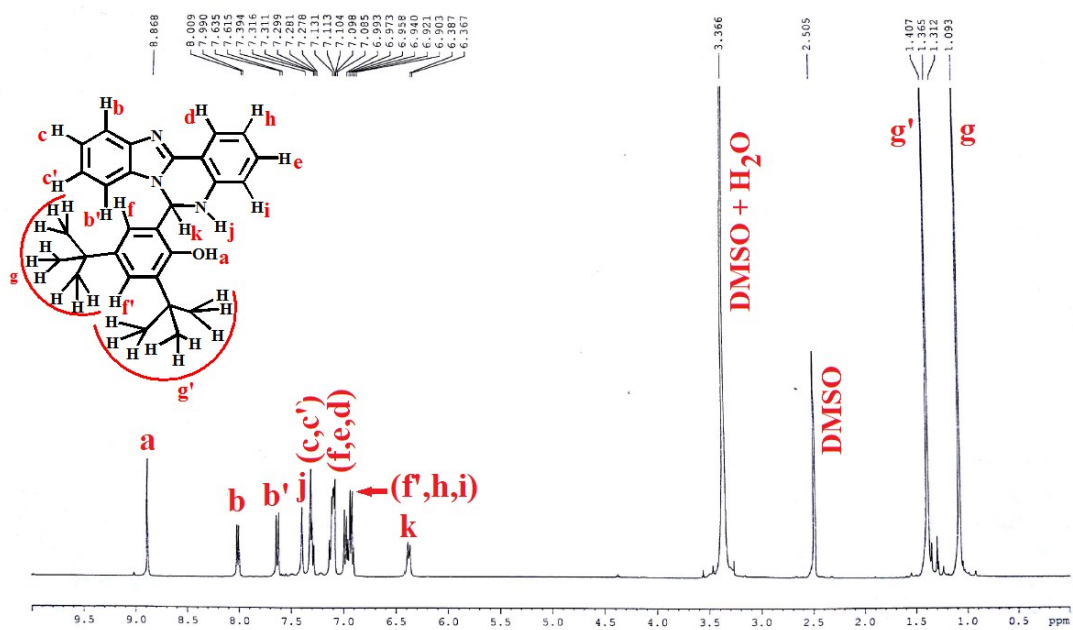

Fig. S2  $^1\text{H}$ NMR spectrum of HL

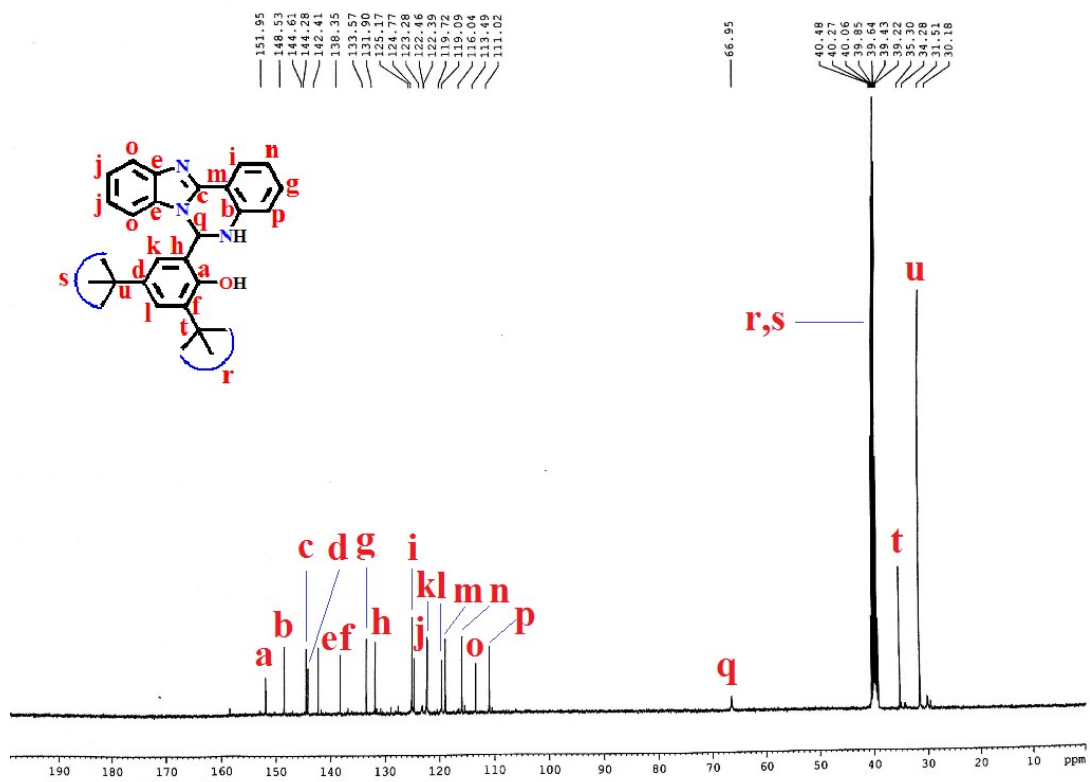

Fig. S3  $^{13}\text{C}$  NMR spectrum of HL

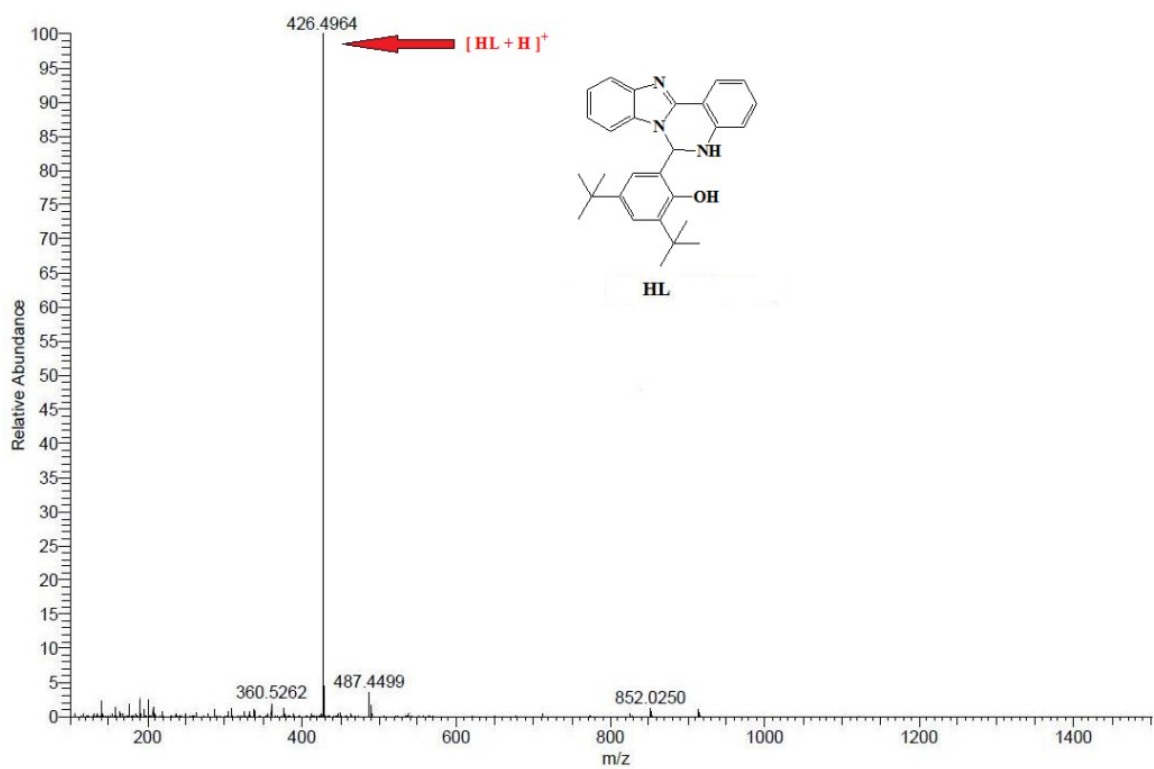

Fig. S4 ESI-Mass spectrum of HL

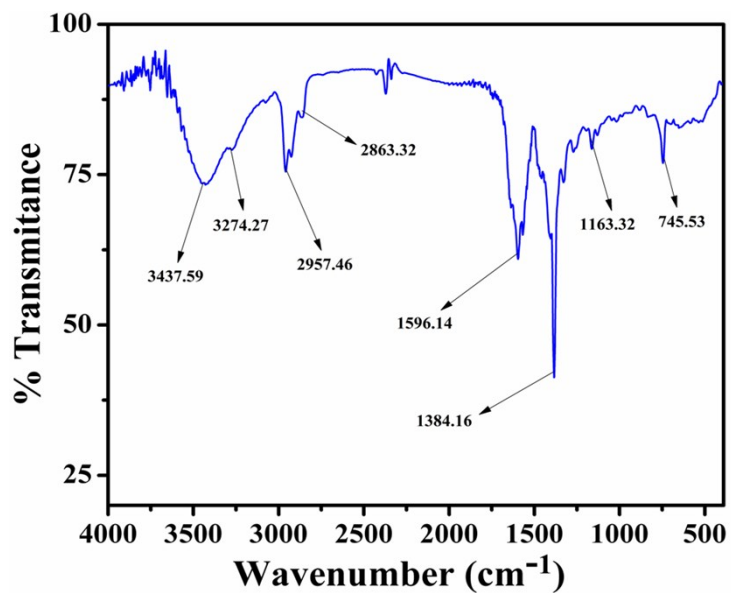

Fig. S5 FTIR spectrum of [Zn(L<sup>1</sup>)<sub>2</sub>] complex

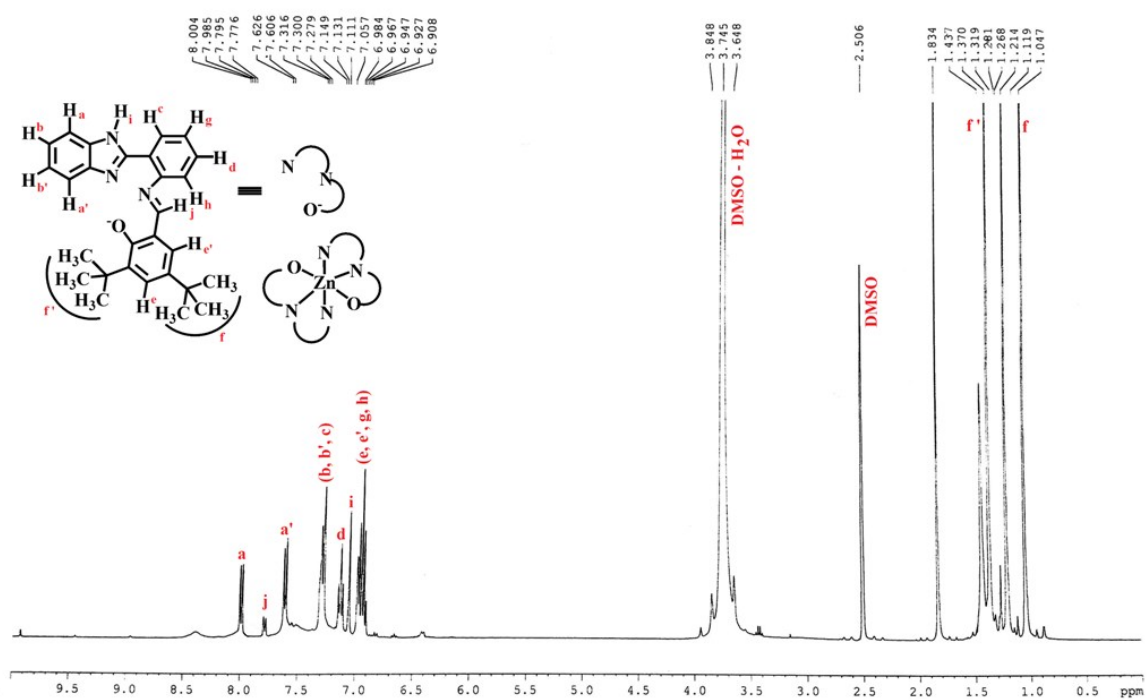

Fig. S6  $^1H$ NMR spectrum of  $[Zn(L^1)_2]$  complex

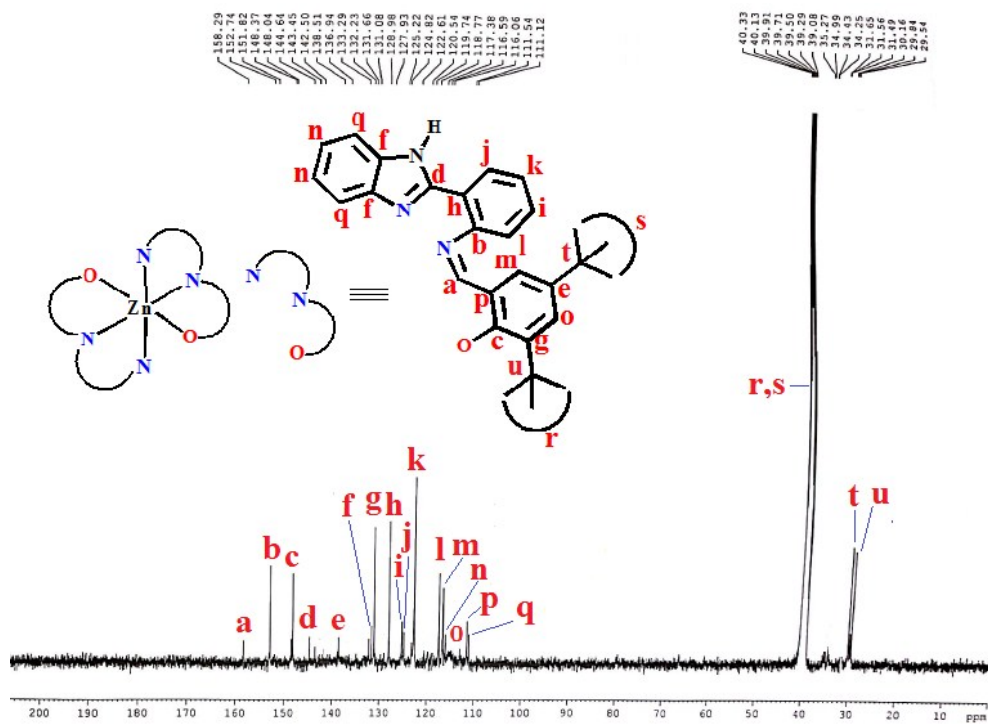

Fig. S7  $^{13}C$  NMR spectrum of  $[Zn(L^1)_2]$  complex

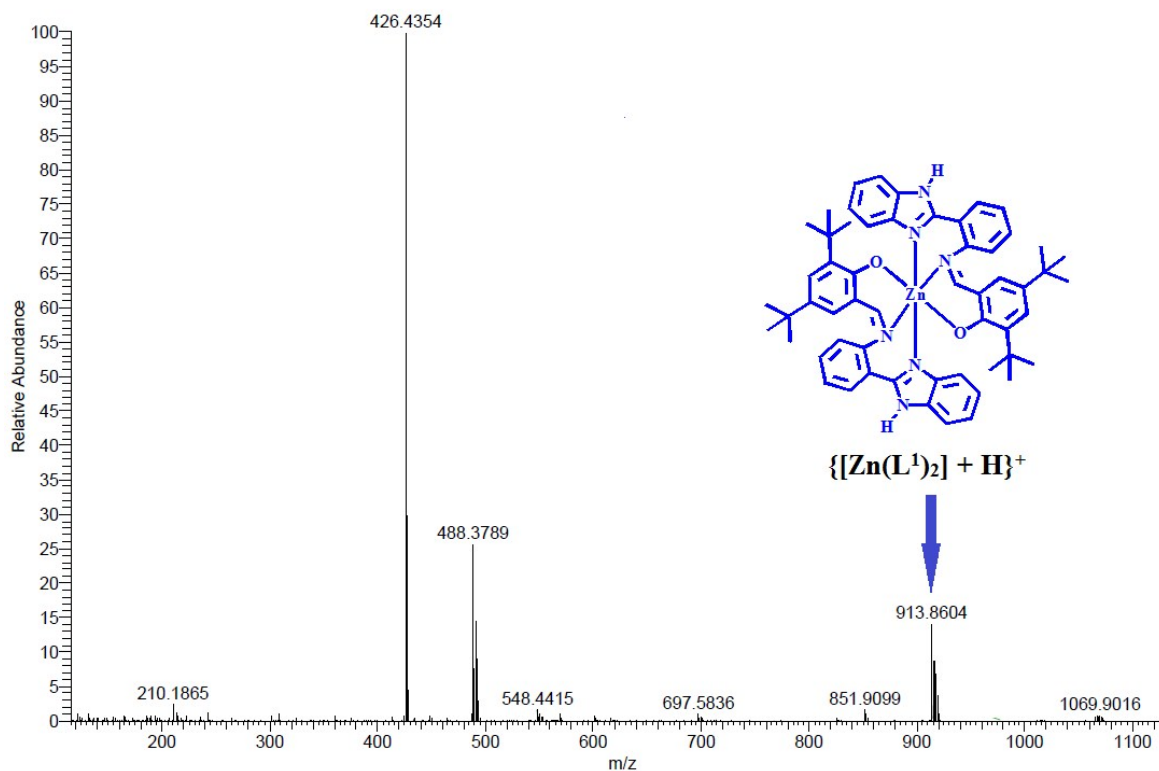

**Fig. S8** ESI-Mass spectrum of  $[Zn(L^1)_2]$  complex

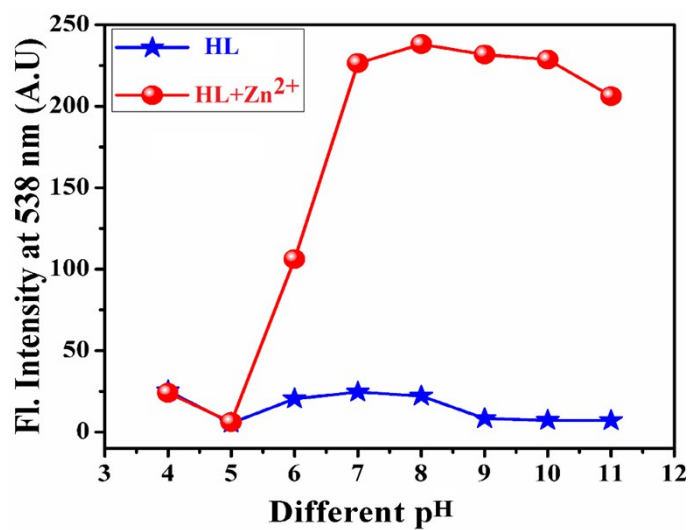

**Fig. S9** Fluorescence response of HL (16  $\mu$ M) in absence and in presence of  $Zn^{2+}$  ions (0.5 equivalent) at different pH in 5 mM HEPES buffer (DMSO:water, 1/5,v/v) at 27  $^{\circ}$ C

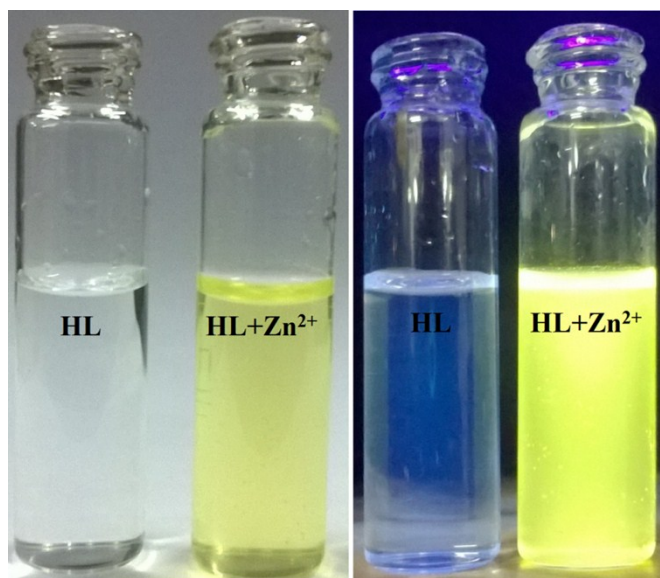

**Fig. S10** Naked eye (left) and fluorescence (right) colour change of the probe (**HL**) in absence and presence of Zn<sup>2+</sup> ions

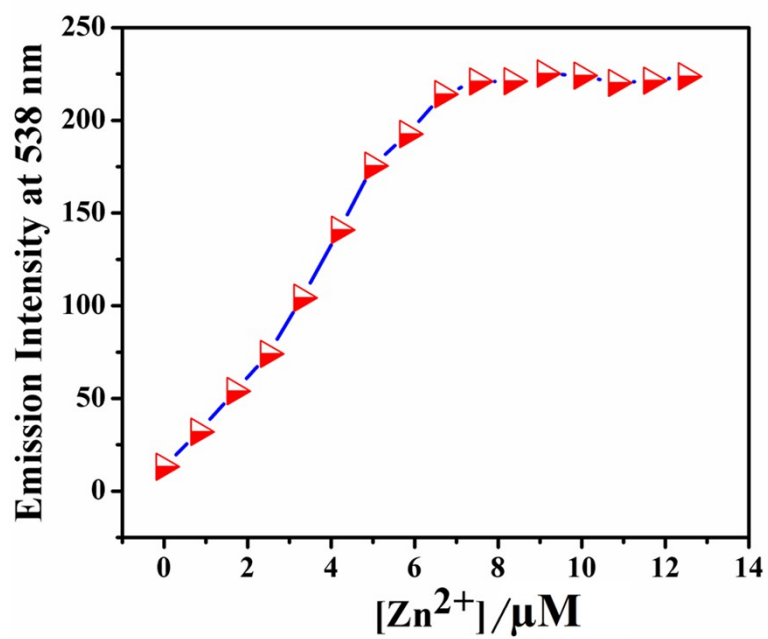

**Fig. S11** The linear response curve of the emission of **HL** at 538 nm depending on Zn<sup>2+</sup> ions concentration

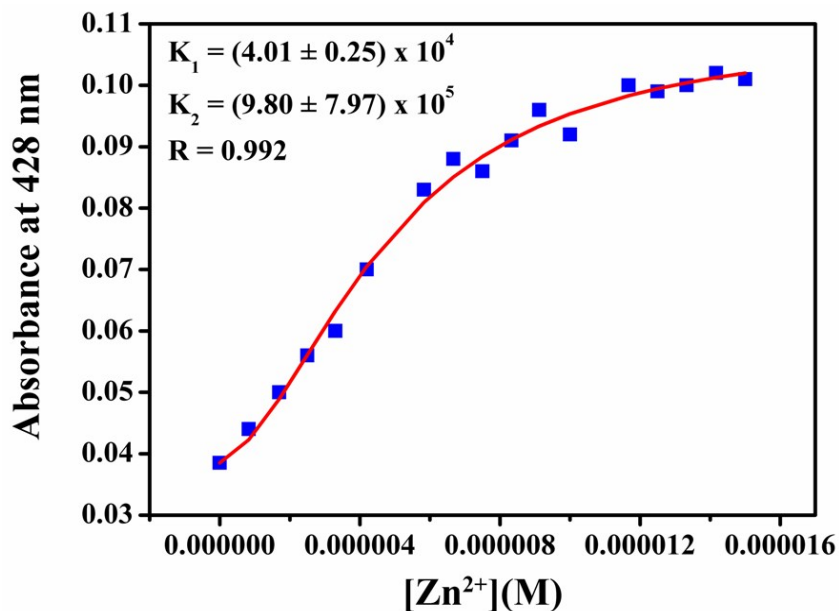

**Fig. S12** Binding constant curve from non-linear fitting of UV-vis titration data

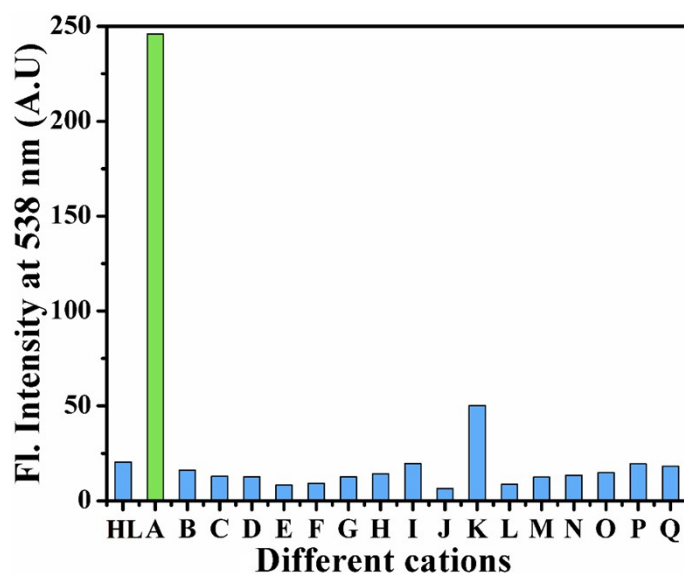

**Fig. S13** Fluorescence intensity of **HL** in presence of different cations in 5 mM HEPES buffer (DMSO : water, 1 : 5, v/v, pH 7.4) at 27°C. **HL** + [(A) Zn<sup>2+</sup>, (B) Na<sup>+</sup>, (C) K<sup>+</sup>, (D) Ca<sup>2+</sup>, (E) Mg<sup>2+</sup>, (F) Ba<sup>2+</sup>, (G) Cr<sup>3+</sup>, (H) Al<sup>3+</sup>, (I) Mn<sup>2+</sup>, (J) Fe<sup>2+</sup>, (K) Co<sup>2+</sup>, (L) Ni<sup>2+</sup>, (M) Cu<sup>2+</sup>, (N) Cd<sup>2+</sup>, (O) Hg<sup>2+</sup>, (P) Fe<sup>3+</sup>, (Q) Pb<sup>2+</sup>]



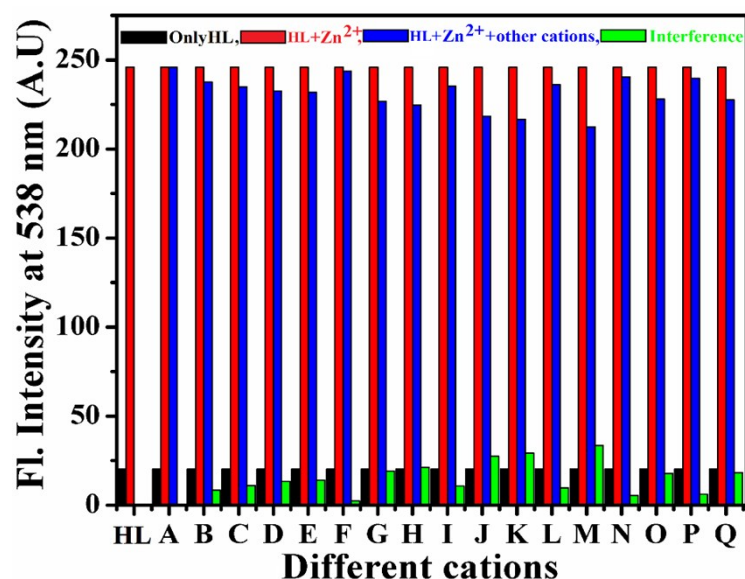

**Fig. S14** Effect of different cations on the fluorescence intensity profile of  $[\text{Zn}(\text{L}^1)_2]$  in 5 mM HEPES buffer (DMSO : water, 1 : 5, v/v, pH 7.4) at 27°C. **HL** + [(A)  $\text{Zn}^{2+}$ , (B)  $\text{Na}^+$ , (C)  $\text{K}^+$ , (D)  $\text{Ca}^{2+}$ , (E)  $\text{Mg}^{2+}$ , (F)  $\text{Ba}^{2+}$ , (G)  $\text{Cr}^{3+}$ , (H)  $\text{Al}^{3+}$ , (I)  $\text{Mn}^{2+}$ , (J)  $\text{Fe}^{2+}$ , (K)  $\text{Co}^{2+}$ , (L)  $\text{Ni}^{2+}$ , (M)  $\text{Cu}^{2+}$ , (N)  $\text{Cd}^{2+}$ , (O)  $\text{Hg}^{2+}$ , (P)  $\text{Fe}^{3+}$ , (Q)  $\text{Pb}^{2+}$ ]

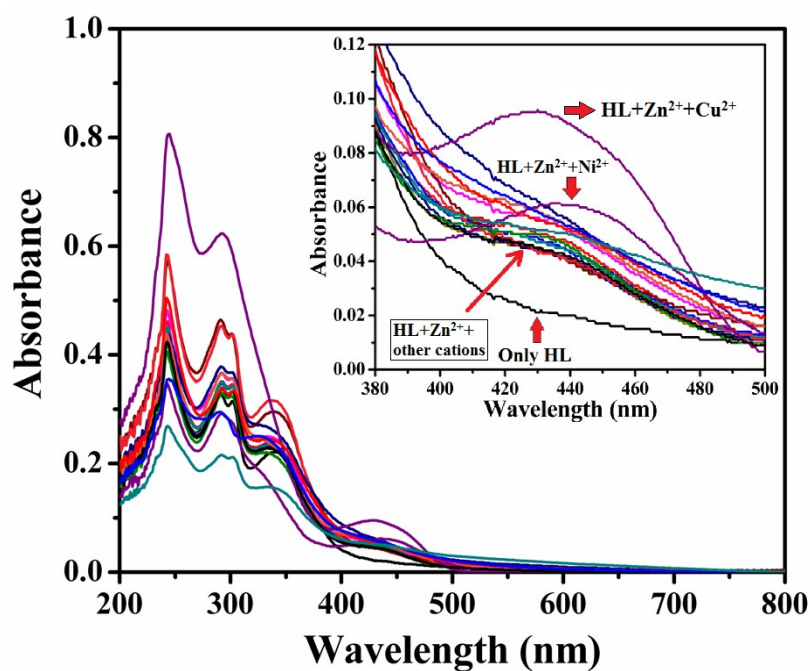

**Fig. S15** Effect of different competitive cations on the absorbance property of  $[\text{Zn}(\text{L}^1)_2]$  in 5 mM HEPES buffer (DMSO : water, 1 : 5, v/v, pH 7.4) at 27°C. Different cations are [ $\text{Na}^+$ ,  $\text{K}^+$ ,  $\text{Ca}^{2+}$ ,  $\text{Mg}^{2+}$ ,  $\text{Ba}^{2+}$ ,  $\text{Cr}^{3+}$ ,  $\text{Al}^{3+}$ ,  $\text{Mn}^{2+}$ ,  $\text{Fe}^{2+}$ ,  $\text{Co}^{2+}$ ,  $\text{Ni}^{2+}$ ,  $\text{Cu}^{2+}$ ,  $\text{Cd}^{2+}$ ,  $\text{Hg}^{2+}$ ,  $\text{Fe}^{3+}$ ,  $\text{Pb}^{2+}$ ]

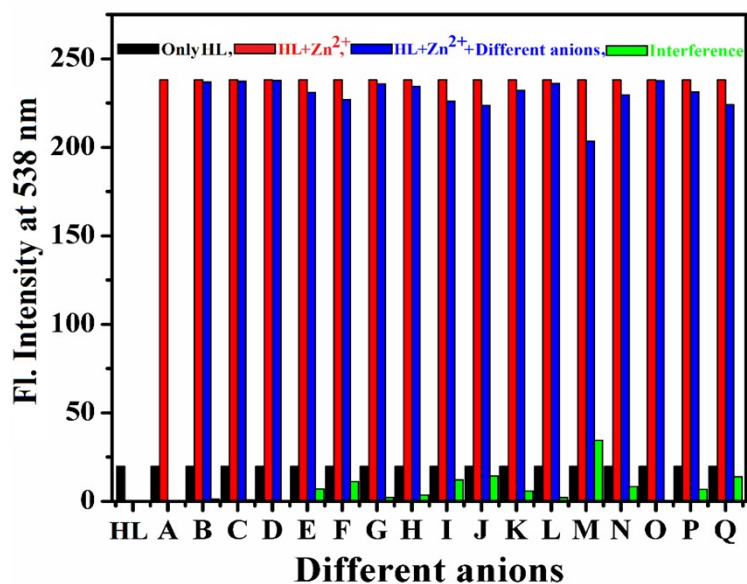

**Fig. S16** Effect of different anions on the fluorescence intensity profile of  $[\text{Zn}(\text{L}^1)_2]$  in 5 mM HEPES buffer (DMSO : water, 1 : 5, v/v, pH 7.4) at 27°C. **HL**, **HL** + (A)  $\text{Zn}^{2+}$ , [**HL** +  $\text{Zn}^{2+}$  + (B)  $\text{OAc}^-$ , (C)  $\text{S}^{2-}$ , (D)  $\text{CN}^-$ , (E)  $\text{MO}_4^{2-}$ , (F)  $\text{HSO}_4^-$ , (G)  $\text{SCN}^-$ , (H)  $\text{HPO}_4^{2-}$ , (I)  $\text{PO}_4^{3-}$ , (J)  $\text{ClO}_4^-$ , (K)  $\text{HAsO}_4^{2-}$ , (L)  $\text{H}_2\text{AsO}_4^-$ , (M)  $\text{H}_2\text{PO}_4^-$ , (N)  $\text{AsO}_2^-$ , (O)  $\text{N}_3^-$ , (P)  $\text{NO}_3^-$ , (Q)  $\text{F}^-$ ]

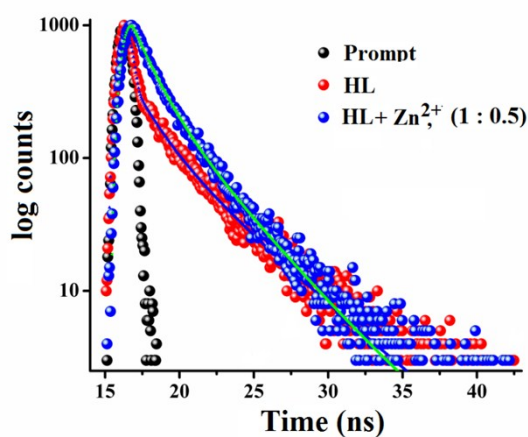

**Fig. S17** Time resolved fluorescence decay of **HL** (16 μM) in absence and presence of added  $\text{Zn}^{2+}$  ions in 5 mM HEPES buffer (DMSO : water, 1 : 5, v/v, pH 7.4) at 27 °C using a nano LED of 440 nm as the light source

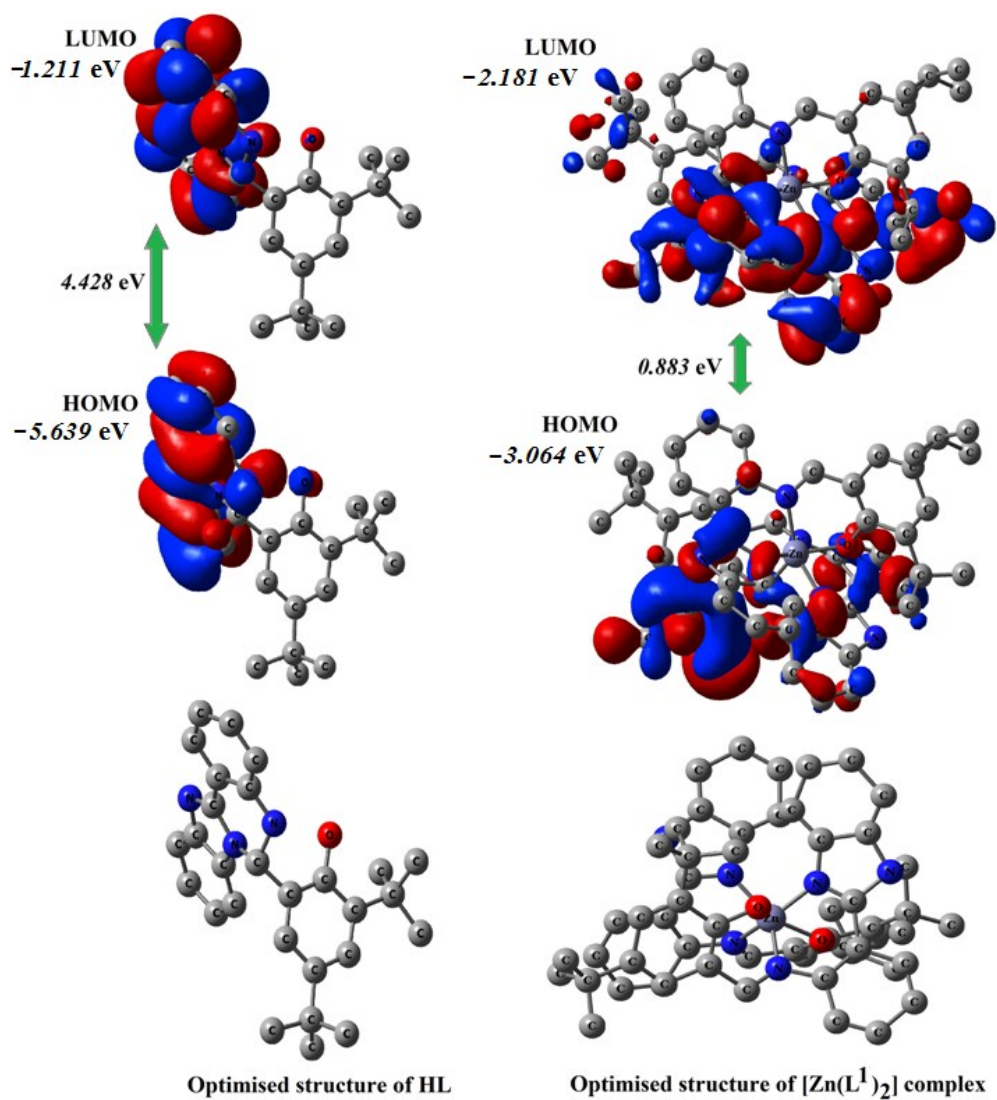

**Fig. S18 (a)** Computational study of probe **HL** and  $[\text{Zn}(\text{L}^1)_2]$  complex (H atoms are omitted for better clarity )

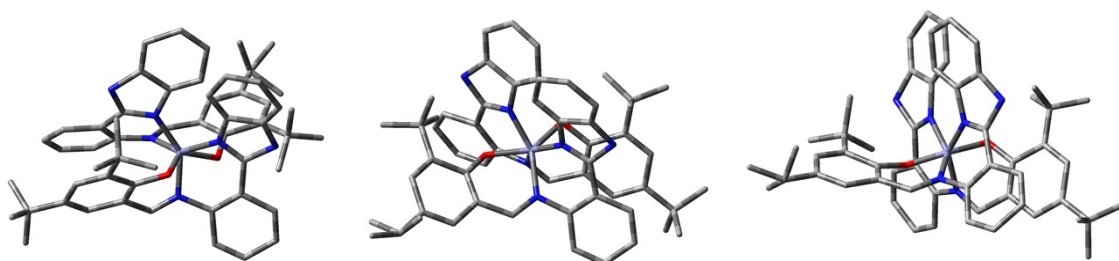

**Fig. S18 (b)** Optimized structure of  $[\text{Zn}(\text{L}^1)_2]$  complex in capstick style presenting with different planes of view ( H atoms are omitted for better clarity)

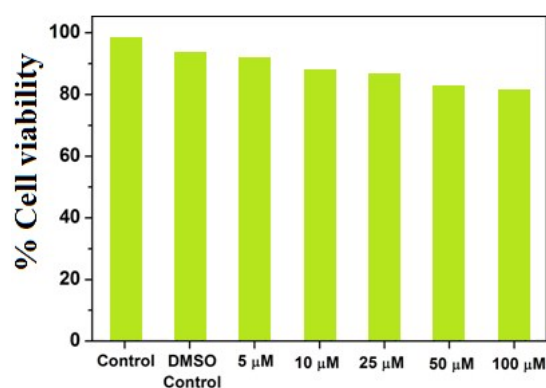

**Fig. S19** Cytotoxic effect of **HL** (5, 10, 25, 50 and 100  $\mu\text{M}$ ) in *Candida sp.* cell incubated for 8 h in reaction buffer

**Table S1** Selected bond distances ( $\text{\AA}$ ) and bond angles ( $^\circ$ ) for  $\text{C}_{28}\text{H}_{32}\text{N}_3\text{O}\cdot\text{NO}_3$

| Bond length ( $\text{\AA}$ ) |          | Bond angles ( $^\circ$ ) |          |
|------------------------------|----------|--------------------------|----------|
| O(1)-C16                     | 1.380(4) | C(7)-N(1)-C(6)           | 109.4(3) |
| N(1)-C(7)                    | 1.339(4) | C(13)-N(3)-C(14)         | 127.2(3) |
| N(1)-C(14)                   | 1.480(4) | N(3)-C(13)-C(8)          | 121.4(3) |
| N(2)-C(7)                    | 1.330(4) | N(3)-C(13)-C(12)         | 120.9(3) |
| N(3)-C(13)                   | 1.352(4) | N(3)-C(14)-N1            | 108.3(3) |
| N(3)-C(14)                   | 1.436(5) | N(1)-C(14)-C(15)         | 110.9(3) |
| C(15)-C(14)                  | 1.510(5) | C(16)-C(15)-C(14)        | 122.3(3) |
| N(1)-C(6)                    | 1.395(5) | N(2)-C(7)-N(1)           | 108.5(3) |

**Table S2** Life time details of **HL** and  $[\text{Zn}(\text{L}^1)_2]$  complex

|                             | $B_1$ | $B_2$ | $B_3$ | $\tau_1$<br>(ns) | $\tau_2$<br>(ns) | $\tau_3$<br>(ns) | $\chi^2$ | $\tau_{\text{av}}$<br>(ns) | $\Phi$ | $k_r$  | $k_{nr}$ |
|-----------------------------|-------|-------|-------|------------------|------------------|------------------|----------|----------------------------|--------|--------|----------|
| <b>HL</b>                   | 20.42 | 38.18 | 41.41 | 1.51             | 4.29             | 0.12             | 1.007    | 1.9959                     | 0.0558 | 0.0279 | 0.4731   |
| $[\text{Zn}(\text{L}^1)_2]$ | 50.75 | 49.25 | -     | 1.37             | 3.53             | -                | 1.019    | 2.4338                     | 0.1895 | 0.0778 | 0.3330   |

**Table S3** Comparison of the importance of this probe (**HL**) with the earlier reports

| <b>Sl No</b> | <b>Detection Limit</b> | <b>Medium</b>                                                                                                                | <b>Reference</b>    |
|--------------|------------------------|------------------------------------------------------------------------------------------------------------------------------|---------------------|
| 1.           | 0.53 nM                | HEPES buffer (50mM, DMSO/water: 1:9 (v/v), pH=7.2); $\lambda_{em}$ = 425 nm; blue fluorescence                               | 37                  |
| 2.           | 10.0 nM                | EtOH : H <sub>2</sub> O = 9:1 (HEPES buffer, pH 7.2); $\lambda_{em}$ = 445 nm; blue fluorescence                             | 51(a)               |
| 3            | 18.2 nM                | Aqueous media, (10 mM HEPES buffer, pH 7.4); $\lambda_{em}$ = 463 nm; blue fluorescence                                      | 51(b)               |
| 4            | 35.0 nM                | DMSO/H <sub>2</sub> O (50:50, v/v); $\lambda_{em}$ = 470 nm; blue fluorescence                                               | 51(c)               |
| 5            | 39.9 nM                | DMSO/H <sub>2</sub> O (1:5, v/v), 5 mM HEPES buffer, pH = 7.4; $\lambda_{em}$ = 538 nm; greenish-yellow fluorescence         | <i>Present work</i> |
| 6            | 40.0 nM                | (H <sub>2</sub> O/CH <sub>3</sub> CN ) 1:1, v/v, 0.1 M HEPES buffer, pH = 7.2); $\lambda_{em}$ = 590 nm; redish fluorescence | 32                  |
| 7            | 48.9 nM                | EtOH–H <sub>2</sub> O (95:5 v/v); $\lambda_{em}$ = 450 nm; blue fluorescence                                                 | 51(d)               |
| 8.           | 80 nM                  | 30% (v/v)ethanol/water, 10mM Tris–HCl at pH 7.03; $\lambda_{em}$ = 460 nm; blue fluorescence                                 | 51(e)               |
| 9            | 286 nM                 | EtOH:H <sub>2</sub> O (9:1, v/v); $\lambda_{em}$ = 496 nm; green fluorescence                                                | 51(f)               |
| 10           | 600.0 nM               | Aqueous media, (HEPES buffer 100 mM, pH 7.0); $\lambda_{em}$ = 445 nm; blue fluorescence                                     | 51(g)               |
| 11           | 1120 nM                | HEPES buffer (10 mM, EtOH/H <sub>2</sub> O 3:1, pH 7.4); $\lambda_{em}$ = 561 nm; yellow fluorescence                        | 51(h)               |
| 12           | 3200 nM                | Aqueous media, HEPES buffer solution at pH 7.4; $\lambda_{em}$ = 506 nm; green fluorescence                                  | 51(i)               |
| 13           | 15,000 nM              | HEPES-buffered CH <sub>3</sub> CN/H <sub>2</sub> O (1:1, v/v,pH = 7.0); $\lambda_{em}$ = 425 nm; blue fluorescence           | 51(j)               |
| 14           | 15600 nM               | 1:9, v/v 0.01 M HEPES buffer, H <sub>2</sub> O-CH <sub>3</sub> CN, pH 7.4; $\lambda_{em}$ = 460 nm; blue fluorescence        | 51(k)               |
